# Supplementary material for: Anilinoquinoline based inhibitors of trypanosomatid proliferation
Source: PubMed Central journal article supplement (PMC6283615; doi:10.1371/journal.pntd.0006834), 2018-11-26
Supplement: pntd.0006834.s001.pdf [file pntd.0006834.s001.pdf]

**Table S1. Screening data for remaining compounds in the data set**

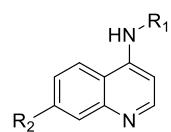

| Molecule Name | R <sub>1</sub> (head) | R <sub>2</sub> (tail) | <i>L. major</i> amastigote EC <sub>50</sub> (μM) <sup>a</sup> | <i>T.b. brucei</i> EC <sub>50</sub> (μM) <sup>b</sup> | <i>T. cruzi</i> amastigote EC <sub>50</sub> (μM) <sup>b</sup> | 3T3 TC <sub>50</sub> (μM) | HepG2 TC <sub>50</sub> (μM) <sup>c</sup> |
|---------------|-----------------------|-----------------------|---------------------------------------------------------------|-------------------------------------------------------|---------------------------------------------------------------|---------------------------|------------------------------------------|
| NEU-2151      |                       |                       | 26                                                            | 2.3                                                   | > 50                                                          | > 100                     | 22                                       |
| NEU-2150      |                       |                       | 31                                                            | 29                                                    | 21                                                            | > 100                     | 48                                       |
| NEU-2149      |                       |                       | 5.3                                                           | 2.3                                                   | > 50                                                          | > 50                      | 5                                        |
| NEU-2148      |                       |                       | 4.7                                                           | 7.6                                                   | > 50                                                          | > 100                     | 36                                       |
| NEU-2147      |                       |                       | 5.5                                                           | 49                                                    | > 50                                                          | > 100                     | 42                                       |
| NEU-2146      |                       |                       | 27                                                            | 17                                                    | > 50                                                          | > 100                     | 40                                       |
| NEU-2145      |                       |                       | 28                                                            | 4.7                                                   | > 50                                                          | > 50                      | 11                                       |
| NEU-2144      |                       |                       | 28                                                            | 14                                                    | > 50                                                          | > 50                      | 35                                       |
| NEU-2143      |                       |                       | 28                                                            | 14                                                    | > 50                                                          | > 50                      | 29                                       |
| NEU-2142      |                       |                       | 26                                                            | 23                                                    | > 50                                                          | > 100                     | 39                                       |
| NEU-2141      |                       |                       | 24                                                            | 4.4                                                   | 22                                                            | 24                        | 7.1                                      |
| NEU-2134      |                       |                       | 27                                                            | > 20                                                  | 1.2                                                           | > 100                     | 42                                       |
| NEU-2133      |                       |                       | 33                                                            | 5.3                                                   | 0.79                                                          | > 50                      | 50                                       |

|          |                                                                                     |                                                                                     |     |      |      |       |     |
|----------|-------------------------------------------------------------------------------------|-------------------------------------------------------------------------------------|-----|------|------|-------|-----|
| NEU-2131 | 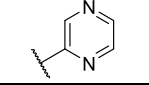   |    | 35  | 4.8  | 4.7  | > 100 | 53  |
| NEU-2130 |    |    | 29  | 2.6  | 1.9  | > 100 | 44  |
| NEU-2129 |    |    | 33  | 3.3  | 2.4  | 37    | 40  |
| NEU-2096 |    |    | 7.9 | 0.91 | 17   | nd    | 17  |
| NEU-2094 |    |    | 3.2 | 0.81 | > 50 | nd    | 21  |
| NEU-2093 |    |    | 4.6 | 0.34 | 8.1  | 15    | 4.7 |
| NEU-2091 |    |    | 5.3 | 0.38 | > 20 | nd    | 22  |
| NEU-2090 |   |   | 2.3 | 0.35 | > 20 | nd    | 7.6 |
| NEU-2088 |  |  | 3   | 0.29 | > 50 | nd    | 4.5 |
| NEU-2087 |  |  | 29  | 0.91 | > 50 | nd    | 23  |
| NEU-1957 |  |  | 21  | 21   | > 50 | > 100 | 14  |
| NEU-1028 |  |  | 4   | > 50 | > 50 | > 100 | 6.4 |
| NEU-1025 |  |  | 8.7 | 1.5  | 8.8  | 11    | 31  |
| NEU-1024 |  |  | 19  | 3    | > 50 | > 100 | 31  |

|                 |                                                                                   |                                                                                   |     |      |      |       |    |
|-----------------|-----------------------------------------------------------------------------------|-----------------------------------------------------------------------------------|-----|------|------|-------|----|
| <b>NEU-1023</b> |  |  | 8.4 | 0.6  | 25   | > 100 | 35 |
| <b>NEU-1020</b> |  |  | 22  | > 50 | > 50 | > 100 | 36 |
| <b>NEU-1019</b> |  |  | 22  | 5.4  | > 50 | > 100 | 36 |
| <b>NEU-1018</b> |  |  | 17  | > 50 | > 50 | > 100 | 28 |

nd=not determined

<sup>a</sup>All  $r^2$  values are >0.9 unless noted otherwise

<sup>b</sup>All SEM values within 25% except for NEU-1957 where  $EC_{50}$  *T. brucei* 21 (SEM: 8.2; 39%) and NEU-1025 where  $EC_{50}$  *T. cruzi* 8.8 (SEM: 2.6; 32%)

<sup>c</sup>Tested concentration ranges were determined based on compound solubility
