# Supplementary material for: Anilinoquinoline based inhibitors of trypanosomatid proliferation
Source: PubMed Central journal article supplement (PMC6283615; doi:10.1371/journal.pntd.0006834), 2018-11-26
Supplement: pntd.0006834.s002.pdf [file pntd.0006834.s002.pdf]

**Table S2. Targeted properties for *T. cruzi* and *Leishmania* spp as set by GHIT, and our established criteria for *T.b. brucei* [1, 2]**

|                                     |                                                                                                                                                     | <i>T. cruzi</i>                                                               | <i>Leishmania</i> spp.                                                                          | <i>T. brucei</i>                                                                     |
|-------------------------------------|-----------------------------------------------------------------------------------------------------------------------------------------------------|-------------------------------------------------------------------------------|-------------------------------------------------------------------------------------------------|--------------------------------------------------------------------------------------|
| <b>Potency</b>                      | EC <sub>50</sub><br>LLE (pEC <sub>50</sub> – cLogP)                                                                                                 | <10 μM                                                                        | <10 μM                                                                                          | <1 μM<br>≥4                                                                          |
| <b><i>In vitro</i><br/>Toxicity</b> | HepG2 TC <sub>50</sub><br>3T3 TC <sub>50</sub>                                                                                                      | ≥10 x EC <sub>50</sub><br>≥10 x EC <sub>50</sub>                              | ≥10 x EC <sub>50</sub><br>≥10 x EC <sub>50</sub>                                                | ≥10 x EC <sub>50</sub><br>≥10 x EC <sub>50</sub>                                     |
| <b>ADME</b>                         | Molecular Weight (g/mol)<br>cLogP<br>LogD<br>RH Cl <sub>int</sub><br>HLM Cl <sub>int</sub><br>Aqueous Solubility (μM)<br>Plasma Protein Binding (%) | Adherence to<br>'rule of five'<br>preferred                                   | Adherence to 'rule<br>of five' preferred                                                        | ≤360<br>≤3<br>≤2<br>≤27<br>≤47<br>>10<br>≤95                                         |
| <b>Efficacy</b>                     |                                                                                                                                                     | >80% reduction<br>in parasite<br>burden after 10<br>doses at 50<br>mg/kg (PO) | >70% reduction in<br>liver parasite<br>burden after max 5<br>doses at 50 mg/kg<br>(PO; QD, BID) | Reduction, control, or<br>elimination of<br>parasitemia following<br>PO or IP dosing |

## References

1. Lipinski, C. A.; Lombardo, F.; Dominy, B. W.; Feeney, P. J., Experimental and computational approaches to estimate solubility and permeability in drug discovery and development settings. The article was originally published in *Advanced Drug Delivery Reviews* 23 (1997) 3–25.1. *Advanced Drug Delivery Reviews* **2001**, 46 (1), 3-26.
2. Katsuno, K.; Burrows, J. N.; Duncan, K.; van Huijsduijnen, R. H.; Kaneko, T.; Kita, K.; Mowbray, C. E.; Schmatz, D.; Warner, P.; Slingsby, B. T., Hit and lead criteria in drug discovery for infectious diseases of the developing world. *Nat Rev Drug Discov* **2015**, 14 (11), 751-758.
