# Supplementary material for: Anilinoquinoline based inhibitors of trypanosomatid proliferation
Source: PubMed Central journal article supplement (PMC6283615; doi:10.1371/journal.pntd.0006834), 2018-11-26
Supplement: pntd.0006834.s003.pdf [file pntd.0006834.s003.pdf]

**Table S3. Lipophilic ligand efficiency (LLE) values for all compounds**

| ID | Molecule Name | Log P | <i>L. major</i><br>amastigote<br>EC <sub>50</sub> (μM) | <i>L. major</i><br>LLE <sup>a</sup> | <i>T.b.</i><br><i>brucei</i><br>EC <sub>50</sub><br>(μM) | <i>T.b.</i><br><i>brucei</i><br>LLE <sup>a</sup> | <i>T. cruzi</i><br>amastigote<br>EC <sub>50</sub> (μM) | <i>T. cruzi</i><br>LLE <sup>a</sup> |
|----|---------------|-------|--------------------------------------------------------|-------------------------------------|----------------------------------------------------------|--------------------------------------------------|--------------------------------------------------------|-------------------------------------|
| 1  | NEU-961       | 6.4   | 1.6                                                    | -0.63                               | 0.079                                                    | 0.67                                             | 0.73                                                   | -0.29                               |
| 2  | NEU-1021      | 2.7   | 3.1                                                    | 2.8                                 | 2.5                                                      | 2.9                                              | > 50                                                   | < 1.6                               |
| 3  | NEU-1022      | 2.7   | 19                                                     | 2.0                                 | 0.62                                                     | 3.5                                              | 9.7                                                    | 2.3                                 |
| 4  | NEU-1027      | 2.3   | 20                                                     | 2.4                                 | 0.91                                                     | 3.8                                              | 16                                                     | 2.5                                 |
| 5  | NEU-1026      | 4.1   | 2.1                                                    | 1.6                                 | 0.27                                                     | 2.5                                              | 2.8                                                    | 1.5                                 |
| 6  | NEU-1029      | 4.6   | 1.4                                                    | 1.3                                 | 0.22                                                     | 2.1                                              | 3.8                                                    | 0.86                                |
| 7  | NEU-1030      | 4.7   | 3.4                                                    | 0.75                                | > 50                                                     | -0.42                                            | > 50                                                   | < -0.42                             |
| 8  | NEU-1031      | 5.2   | 2.4                                                    | 0.38                                | 0.65                                                     | 0.95                                             | > 50                                                   | < -0.94                             |
| 9  | NEU-1926      | 4.0   | 4.4                                                    | 1.4                                 | 0.52                                                     | 2.3                                              | 1.9                                                    | 1.80                                |
| 10 | NEU-1927      | 5.6   | 0.78                                                   | 0.56                                | 0.27                                                     | 1.0                                              | 1.4                                                    | 0.30                                |
| 11 | NEU-1929      | 3.0   | 3.9                                                    | 2.4                                 | 0.69                                                     | 3.1                                              | 9.9                                                    | 2.0                                 |
| 12 | NEU-1930      | 4.2   | 6.2                                                    | 1.0                                 | 0.7                                                      | 2.0                                              | 5.4                                                    | 1.1                                 |
| 13 | NEU-1931      | 6.4   | 0.2                                                    | 0.27                                | 0.48                                                     | -0.11                                            | > 50                                                   | < -2.1                              |
| 14 | NEU-1060      | 6.2   | 1.5                                                    | -0.42                               | 0.006                                                    | 2.0                                              | 0.09                                                   | 0.81                                |
| 15 | NEU-1899      | 6.9   | 0.96                                                   | -0.83                               | 0.14                                                     | 0.0039                                           | 4.7                                                    | -1.5                                |
| 16 | NEU-1900      | 5.8   | 0.83                                                   | 0.24                                | 0.11                                                     | 1.1                                              | 0.92                                                   | 0.20                                |
| 17 | NEU-2076      | 7.3   | 1.2                                                    | -1.4                                | 0.12                                                     | -0.36                                            | 2.1                                                    | -1.6                                |
| 18 | NEU-2152      | 6.0   | 0.87                                                   | 0.030                               | 0.16                                                     | 0.77                                             | 2.7                                                    | -0.46                               |
| 19 | NEU-2086      | 6.6   | 2.5                                                    | -1.0                                | 0.12                                                     | 0.29                                             | 2.7                                                    | -1.1                                |
| 20 | NEU-2077      | 6.6   | 1.2                                                    | -0.71                               | 0.098                                                    | 0.38                                             | 4.3                                                    | -1.3                                |
| 21 | NEU-1898      | 6.8   | 1.1                                                    | -0.84                               | 0.15                                                     | 0.024                                            | 0.6                                                    | -0.58                               |
| 22 | NEU-1953      | 2.1   | 2.5                                                    | 3.5                                 | 0.43                                                     | 4.3                                              | 6                                                      | 3.1                                 |
| 23 | NEU-1956      | 4.4   | 2                                                      | 1.3                                 | 0.91                                                     | 1.7                                              | 0.62                                                   | 1.8                                 |
|    | NEU-1018      | 3.4   | 17                                                     | 1.4                                 | > 50                                                     | 0.89                                             | > 50                                                   | < 0.89                              |
|    | NEU-1019      | 2.9   | 22                                                     | 1.8                                 | 5.4                                                      | 2.4                                              | > 50                                                   | < 1.4                               |
|    | NEU-1020      | 1.9   | 22                                                     | 2.7                                 | > 50                                                     | 2.4                                              | > 50                                                   | < 2.4                               |
|    | NEU-1023      | 3.4   | 8.4                                                    | 1.7                                 | 0.6                                                      | 2.8                                              | 25                                                     | 1.2                                 |
|    | NEU-1024      | 2.5   | 19                                                     | 2.2                                 | 3                                                        | 3.0                                              | > 50                                                   | < 1.8                               |
|    | NEU-1025      | 3.5   | 8.7                                                    | 1.6                                 | 1.5                                                      | 2.3                                              | 8.8                                                    | 1.6                                 |
|    | NEU-1028      | 2.2   | 4                                                      | 3.2                                 | > 50                                                     | 2.1                                              | > 50                                                   | < 2.1                               |
|    | NEU-1957      | 3.2   | 21                                                     | 1.5                                 | 21                                                       | 1.5                                              | > 50                                                   | < 1.1                               |
|    | NEU-2087      | 4.0   | 29                                                     | 0.57                                | 0.91                                                     | 2.1                                              | > 50                                                   | < 0.33                              |
|    | NEU-2088      | 1.7   | 3                                                      | 3.8                                 | 0.29                                                     | 4.9                                              | > 50                                                   | < 2.6                               |
|    | NEU-2090      | 4.8   | 2.3                                                    | 0.88                                | 0.35                                                     | 1.7                                              | > 20                                                   | < -0.061                            |
|    | NEU-2091      | 2.5   | 5.3                                                    | 2.8                                 | 0.38                                                     | 4.0                                              | > 20                                                   | < 2.2                               |
|    | NEU-2093      | 4.8   | 4.6                                                    | 0.58                                | 0.34                                                     | 1.7                                              | 8.1                                                    | 0.33                                |

|  |                 |     |     |       |      |         |      |       |
|--|-----------------|-----|-----|-------|------|---------|------|-------|
|  | <b>NEU-2094</b> | 2.5 | 3.2 | 3.0   | 0.81 | 3.6     | > 50 | < 1.8 |
|  | <b>NEU-2096</b> | 3.1 | 7.9 | 2.0   | 0.91 | 2.9     | 17   | 1.6   |
|  | <b>NEU-2129</b> | 1.8 | 33  | 2.7   | 3.3  | 3.7     | 2.4  | 3.8   |
|  | <b>NEU-2130</b> | 4.0 | 29  | 0.54  | 2.6  | 1.6     | 1.9  | 1.7   |
|  | <b>NEU-2131</b> | 2.4 | 35  | 2.0   | 4.8  | 2.9     | 4.7  | 2.9   |
|  | <b>NEU-2133</b> | 2.6 | 33  | 1.8   | 5.3  | 2.6     | 0.79 | 3.5   |
|  | <b>NEU-2134</b> | 4.9 | 27  | -0.35 | > 20 | < -0.22 | 1.2  | 1.0   |
|  | <b>NEU-2141</b> | 2.5 | 24  | 2.1   | 4.4  | 2.8     | 22   | 2.1   |
|  | <b>NEU-2142</b> | 1.9 | 26  | 2.7   | 23   | 2.7     | > 50 | < 2.4 |
|  | <b>NEU-2143</b> | 1.6 | 28  | 3.0   | 14   | 3.3     | > 50 | < 2.7 |
|  | <b>NEU-2144</b> | 1.7 | 28  | 2.9   | 14   | 3.2     | > 50 | < 2.6 |
|  | <b>NEU-2145</b> | 1.0 | 28  | 3.6   | 4.7  | 4.4     | > 50 | < 3.4 |
|  | <b>NEU-2146</b> | 1.8 | 27  | 2.8   | 17   | 3.0     | > 50 | < 2.5 |
|  | <b>NEU-2147</b> | 2.0 | 5.5 | 3.3   | 49   | 2.3     | > 50 | < 2.3 |
|  | <b>NEU-2148</b> | 2.4 | 4.7 | 2.9   | 7.6  | 2.7     | > 50 | < 1.9 |
|  | <b>NEU-2149</b> | 3.2 | 5.3 | 2.1   | 2.3  | 2.5     | > 50 | < 1.1 |
|  | <b>NEU-2150</b> | 1.8 | 31  | 2.7   | 29   | 2.8     | 21   | 2.9   |
|  | <b>NEU-2151</b> | 1.2 | 26  | 3.4   | 2.3  | 4.4     | > 50 | < 3.1 |

<sup>a</sup>Lipophilic ligand efficiency (LLE):  $pEC_{50} - \text{LogP}$
