# Supplementary material for: Anilinoquinoline based inhibitors of trypanosomatid proliferation
Source: PubMed Central journal article supplement (PMC6283615; doi:10.1371/journal.pntd.0006834), 2018-11-26
Supplement: pntd.0006834.s004.pdf [file pntd.0006834.s004.pdf]

**Table S4. ADME data of all compounds**

| ID | Molecule Name | cLogP | Polar surface area (Å <sup>2</sup> ) | Aqueous Solubility (μM) | Human PPB (%) | Human Liver Microsome CLint (μL/min/mg) | Rat Hepatocyte CLint (μL/min/10 <sup>6</sup> cells) | LogD <sub>7.4</sub> |
|----|---------------|-------|--------------------------------------|-------------------------|---------------|-----------------------------------------|-----------------------------------------------------|---------------------|
| 1  | NEU-961       | 6.4   | 75                                   | 0.3                     | > 99          | 140                                     | 20                                                  | -                   |
| 2  | NEU-1021      | 2.7   | 100                                  | 7.3                     | 88            | -                                       | -                                                   | 3.1                 |
| 3  | NEU-1022      | 2.7   | 100                                  | 3.2                     | 97            | -                                       | -                                                   | 4.2                 |
| 4  | NEU-1027      | 2.3   | 91                                   | 4.2                     | 94            | -                                       | -                                                   | 3.2                 |
| 5  | NEU-1026      | 4.1   | 78                                   | < 1                     | > 99          | -                                       | -                                                   | -                   |
| 6  | NEU-1029      | 4.6   | 75                                   | 100                     | 99            | 270                                     | 44                                                  | < 1                 |
| 7  | NEU-1030      | 4.7   | 66                                   | -                       | > 99          | 150                                     | 15                                                  | -                   |
| 8  | NEU-1031      | 5.2   | 66                                   | -                       | -             | 290                                     | -                                                   | -                   |
| 9  | NEU-1926      | 4     | 75                                   | 9                       | -             | 350                                     | 58                                                  | 4.2                 |
| 10 | NEU-1927      | 5.6   | 75                                   | -                       | > 99          | 280                                     | 79                                                  | 4.5                 |
| 11 | NEU-1929      | 3     | 78                                   | -                       | 92            | 400                                     | 49                                                  | 3.7                 |
| 12 | NEU-1930      | 4.2   | 78                                   | -                       | 98            | 390                                     | 260                                                 | 4.4                 |
| 13 | NEU-1931      | 6.4   | 75                                   | < 1                     | > 99          | 110                                     | 24                                                  | 4.8                 |
| 14 | NEU-1060      | 6.2   | 66                                   | < 1                     | > 99          | 54                                      | 24                                                  | 3.4                 |
| 15 | NEU-1899      | 6.9   | 66                                   | < 0.1                   | 100           | 35                                      | 35                                                  | 4.1                 |
| 16 | NEU-1900      | 5.8   | 63                                   | 12                      | > 99          | < 3                                     | 17                                                  | 4.6                 |
| 17 | NEU-2076      | 7.3   | 53                                   | -                       | -             | -                                       | -                                                   | -                   |
| 18 | NEU-2152      | 6.0   | 78                                   | -                       | -             | -                                       | -                                                   | -                   |
| 19 | NEU-2086      | 6.6   | 78                                   | 1                       | -             | 21                                      | 4.6                                                 | 4.7                 |
| 20 | NEU-2077      | 6.6   | 78                                   | -                       | -             | -                                       | -                                                   | -                   |
| 21 | NEU-1898      | 6.8   | 73                                   | 0.2                     | 100           | 29                                      | 48                                                  | 4.3                 |
| 22 | NEU-1953      | 2.1   | 83                                   | 44                      | 87            | 180                                     | 130                                                 | 3.3                 |
| 23 | NEU-1956      | 4.4   | 66                                   | < 1                     | 98            | 170                                     | 45                                                  | 4.3                 |
|    | NEU-1018      | 3.5   | 110                                  | < 1                     | 98            | -                                       | -                                                   | 3.4                 |
|    | NEU-1019      | 2.9   | 78                                   | 175                     | 85            | -                                       | -                                                   | 2                   |
|    | NEU-1020      | 1.9   | 91                                   | > 1000                  | 57            | -                                       | -                                                   | -0.5                |
|    | NEU-1023      | 3.4   | 78                                   | < 1                     | 99            | -                                       | -                                                   | 4.2                 |
|    | NEU-1024      | 2.5   | 120                                  | < 1                     | 97            | -                                       | -                                                   | 3.7                 |
|    | NEU-1025      | 3.5   | 91                                   | 4.8                     | 99            | -                                       | -                                                   | 4.1                 |
|    | NEU-1028      | 2.2   | 100                                  | 1.5                     | 93            | -                                       | -                                                   | 3.4                 |
|    | NEU-1957      | 3.2   | 99                                   | < 1                     | 91            | 120                                     | 51                                                  | 3.3                 |
|    | NEU-2087      | 4     | 63                                   | 2                       | 97            | 8                                       | 5                                                   | 3.5                 |
|    | NEU-2088      | 1.7   | 79                                   | 1                       | -             | 130                                     | 5                                                   | 2.6                 |

|  |                 |     |     |     |      |       |       |     |
|--|-----------------|-----|-----|-----|------|-------|-------|-----|
|  | <b>NEU-2090</b> | 4.8 | 78  | 570 | 99   | -     | 7.2   | 3.3 |
|  | <b>NEU-2091</b> | 2.5 | 95  | 26  | -    | -     | 9.3   | 2.8 |
|  | <b>NEU-2093</b> | 4.8 | 78  | -   | -    | 45    | 2.3   | -   |
|  | <b>NEU-2094</b> | 2.5 | 95  | 2   | -    | -     | -     | 2.9 |
|  | <b>NEU-2096</b> | 3.1 | 69  | 810 | 88   | -     | 10    | 2.2 |
|  | <b>NEU-2129</b> | 1.8 | 69  | 4   | -    | 25    | 290   | 2.9 |
|  | <b>NEU-2130</b> | 4   | 52  | -   | -    | -     | -     |     |
|  | <b>NEU-2131</b> | 2.4 | 64  | 6   | 98   | 160   | -     | 3.8 |
|  | <b>NEU-2133</b> | 2.6 | 64  | 4   | 99   | 190   | 290   | 4   |
|  | <b>NEU-2134</b> | 4.9 | 47  | 0.1 | > 99 | > 300 | 193   | 4.8 |
|  | <b>NEU-2141</b> | 2.5 | 76  | 4   | 91   | 68    | 270   | 3.3 |
|  | <b>NEU-2142</b> | 1.9 | 81  | 570 | 59   | 13    | 32    | 2   |
|  | <b>NEU-2143</b> | 1.6 | 81  | -   | 63   | 10    | 66    | 1.9 |
|  | <b>NEU-2144</b> | 1.7 | 81  | 100 | 69   | 10    | 16    | 2.4 |
|  | <b>NEU-2145</b> | 1   | 100 | 3   | 75   | 42    | > 300 | 2.1 |
|  | <b>NEU-2146</b> | 1.8 | 91  | -   | 68   | 8     | 120   | 1.8 |
|  | <b>NEU-2147</b> | 2   | 81  | 160 | 57   | 12    | 37    | 1.7 |
|  | <b>NEU-2148</b> | 2.4 | 76  | 2   | -    | 28    | 9     | 3.5 |
|  | <b>NEU-2149</b> | 3.2 | 76  | 1   | 96   | 54    | > 300 | 3.7 |
|  | <b>NEU-2150</b> | 1.8 | 89  | -   | -    | -     | -     | -   |
|  | <b>NEU-2151</b> | 1.2 | 101 | -   | -    | -     | -     | -   |
