# Supplementary material for: Anilinoquinoline based inhibitors of trypanosomatid proliferation
Source: PubMed Central journal article supplement (PMC6283615; doi:10.1371/journal.pntd.0006834), 2018-11-26
Supplement: pntd.0006834.s005.pdf [file pntd.0006834.s005.pdf]

**Table S5. Pharmacokinetic parameters of NEU-1060 (compound 14) in plasma and brain following a single intraperitoneal administration in female BALB/c mice (Dose: 10 mg/kg)**

| Compound | Dose (mg/kg) | Route | Matrix | T <sub>max</sub> (hr) | C <sub>max</sub> (ng/mL) | AUC <sub>last</sub> (hr*ng/mL) | AUC <sub>inf</sub> (hr*ng/mL) |
|----------|--------------|-------|--------|-----------------------|--------------------------|--------------------------------|-------------------------------|
| NEU-1060 | 10           | i.p.  | Plasma | 0.25                  | 73.98                    | 467.90                         | NC                            |
|          |              |       | Brain* | 4.00                  | 210.77                   | 3474.83                        | NC                            |

\*The density of brain homogenate was considered as 1 which is equivalent to plasma density (1);

Brain conc. and exposure expressed as ng/g and hr.ng/g, respectively.

NC – not calculated due to improper elimination phase
