# Supplementary material for: Anilinoquinoline based inhibitors of trypanosomatid proliferation
Source: PubMed Central journal article supplement (PMC6283615; doi:10.1371/journal.pntd.0006834), 2018-11-26
Supplement: pntd.0006834.s006.pdf [file pntd.0006834.s006.pdf]

**Table S6. Brain to plasma exposure ratio of NEU-1060 (compound 14) after a single intraperitoneal administration in female BALB/c mice (Dose: 10 mg/kg)**

| Compound | Dose (mg/kg) | Route | Matrix | C <sub>max</sub> (ng/mL) | C <sub>max</sub> ratio | AUC <sub>last</sub> (hr*ng/mL) | Brain to plasma exposure ratio |
|----------|--------------|-------|--------|--------------------------|------------------------|--------------------------------|--------------------------------|
| NEU-1060 | 10           | i.p.  | Plasma | 73.98                    | 2.85                   | 467.90                         | 7.43                           |
|          |              |       | Brain* | 210.77                   |                        | 3474.83                        |                                |

\*The density of brain homogenate was considered as 1 which is equivalent to plasma density (1); Brain conc. and exposure expressed as ng/g and hr.ng/g, respectively.
