# Supplementary material for: Anilinoquinoline based inhibitors of trypanosomatid proliferation
Source: PubMed Central journal article supplement (PMC6283615; doi:10.1371/journal.pntd.0006834), 2018-11-26

**Figure S1. Mean plasma and brain concentration-time profiles of NEU-1060 (compound 14) following a single intraperitoneal administration in female BALB/c mice (Dose: 10 mg/kg)**

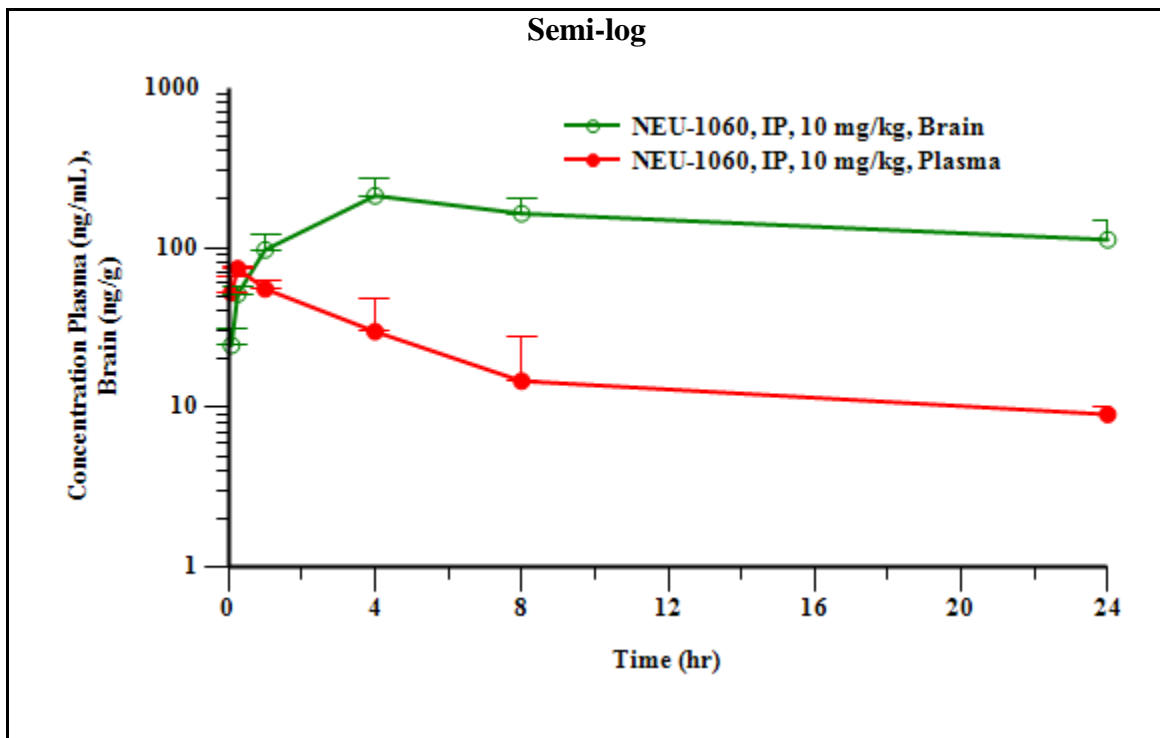

Supplement: pntd.0006834.s007.pdf [file pntd.0006834.s007.pdf]
