# Supplementary material for: Anilinoquinoline based inhibitors of trypanosomatid proliferation
Source: PubMed Central journal article supplement (PMC6283615; doi:10.1371/journal.pntd.0006834), 2018-11-26
Supplement: pntd.0006834.s008.pdf [file pntd.0006834.s008.pdf]

**Figure S2. Parasitemia levels of *T. b. brucei* infected mice treated with 25 mg/kg NEU-1060 (compound 14), compared with the control group (dimethylsulfoxide (DMSO) only)**

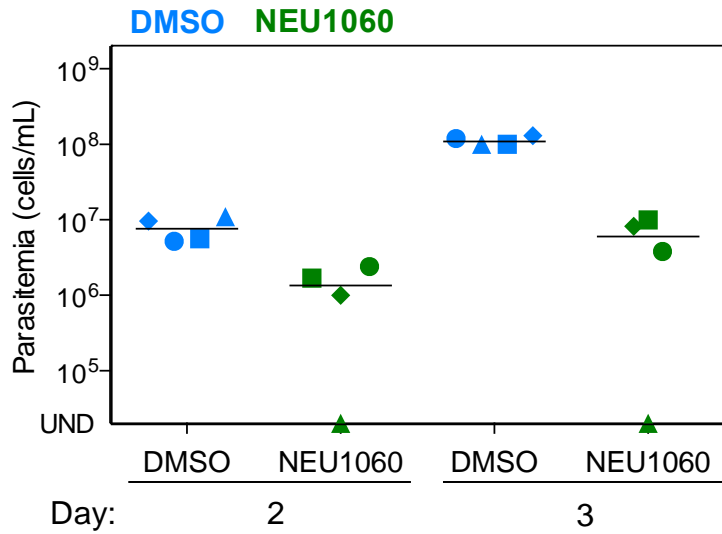

NEU-1060 (compound 14) and DMSO were administered once i.p. on Day 1 post-infection. Parasitemia in the blood collected from the tail vein was determined on Days 2 and 3 post-infection. UND: Undetectable parasitemia ( $<2 \times 10^4$  cells/mL), the black horizontal line in each group indicates the median parasitemia level. The different shapes are representative of each mouse in the group.
